# Supplementary material
Source: Springer Nature journal article supplement (https://www.springermedizin.de/resource/supplementary/12885_2008_1279_MOESM2_ESM.pdf/9471626)

$$y = 1.6946x + 61.376$$

$$R^2 = 0.8186 \quad r = 0.90$$

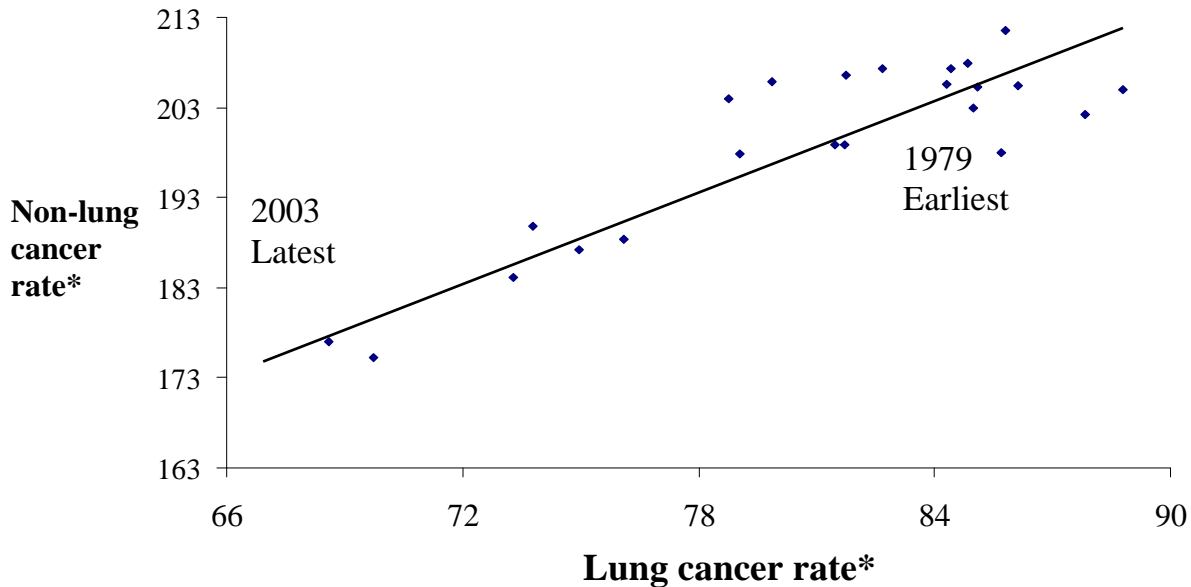

\*deaths/100,000 adjusted to the 2000 US age standard

Supplement: MOESM2 [file 9471626]
